# Supplementary material for: In vivo induction of activin A-producing alveolar macrophages supports the progression of lung cell carcinoma
Source: PubMed Central journal article supplement (PMC9845242; doi:10.1038/s41467-022-35701-8), 2023-01-17
Supplement: 41467_2022_35701_MOESM1_ESM.pdf [file 41467_2022_35701_MOESM1_ESM.pdf]

## Supplementary Data

**Title: In vivo induction of activin A-producing alveolar macrophages supports the progression of lung cell carcinoma**

**Author List:** Seiji Taniguchi<sup>1,2,3</sup>, Takahiro Matsui<sup>1,4,\*</sup>, Kenji Kimura<sup>3</sup>, Soichiro Funaki<sup>3</sup>, Yu Miyamoto<sup>1,2</sup>, Yutaka Uchida<sup>1,2</sup>, Takao Sudo<sup>1,2</sup>, Junichi Kikuta<sup>1,2,5</sup>, Tetsuya Hara<sup>6</sup>, Daisuke Motooka<sup>7,8</sup>, Yu-Chen Liu<sup>8</sup>, Daisuke Okuzaki<sup>7,8</sup>, Eiichi Morii<sup>4</sup>, Noriaki Emoto<sup>6</sup>, Yasushi Shintani<sup>3</sup>, and Masaru Ishii<sup>1,2,5,\*</sup>

### **Affiliations:**

1: Department of Immunology and Cell Biology, Osaka University Graduate School of Medicine, Suita, Osaka 565-0871, Japan.

2: Laboratory of Immunology and Cell Biology, Immunology Frontier Research Center, Osaka University Graduate School of Medicine, Suita, Osaka 565-0871, Japan

3: Department of General Thoracic Surgery, Osaka University Graduate School of Medicine, Suita, Osaka 565-0871, Japan.

4: Department of Pathology, Osaka University Graduate School of Medicine, Suita, Osaka 565-0871, Japan.

5: Laboratory of Bioimaging and Drug Discovery, National Institutes of Biomedical Innovation, Health and Nutrition, Ibaraki, Osaka 567-0085, Japan

6: Laboratory of Clinical Pharmaceutical Science, Kobe Pharmaceutical University, Higashinada, Kobe 658-8558, Japan

7: Genome Information Research Center, Research Institute for Microbial Diseases, Osaka University; Suita, Osaka 565-0871, Japan.

8: Laboratory of Human Immunology (Single Cell Genomics), WPI Immunology Research Center, Osaka University, Suita, Osaka 565-0871, Japan.

\* Corresponding authors

## Supplementary Information

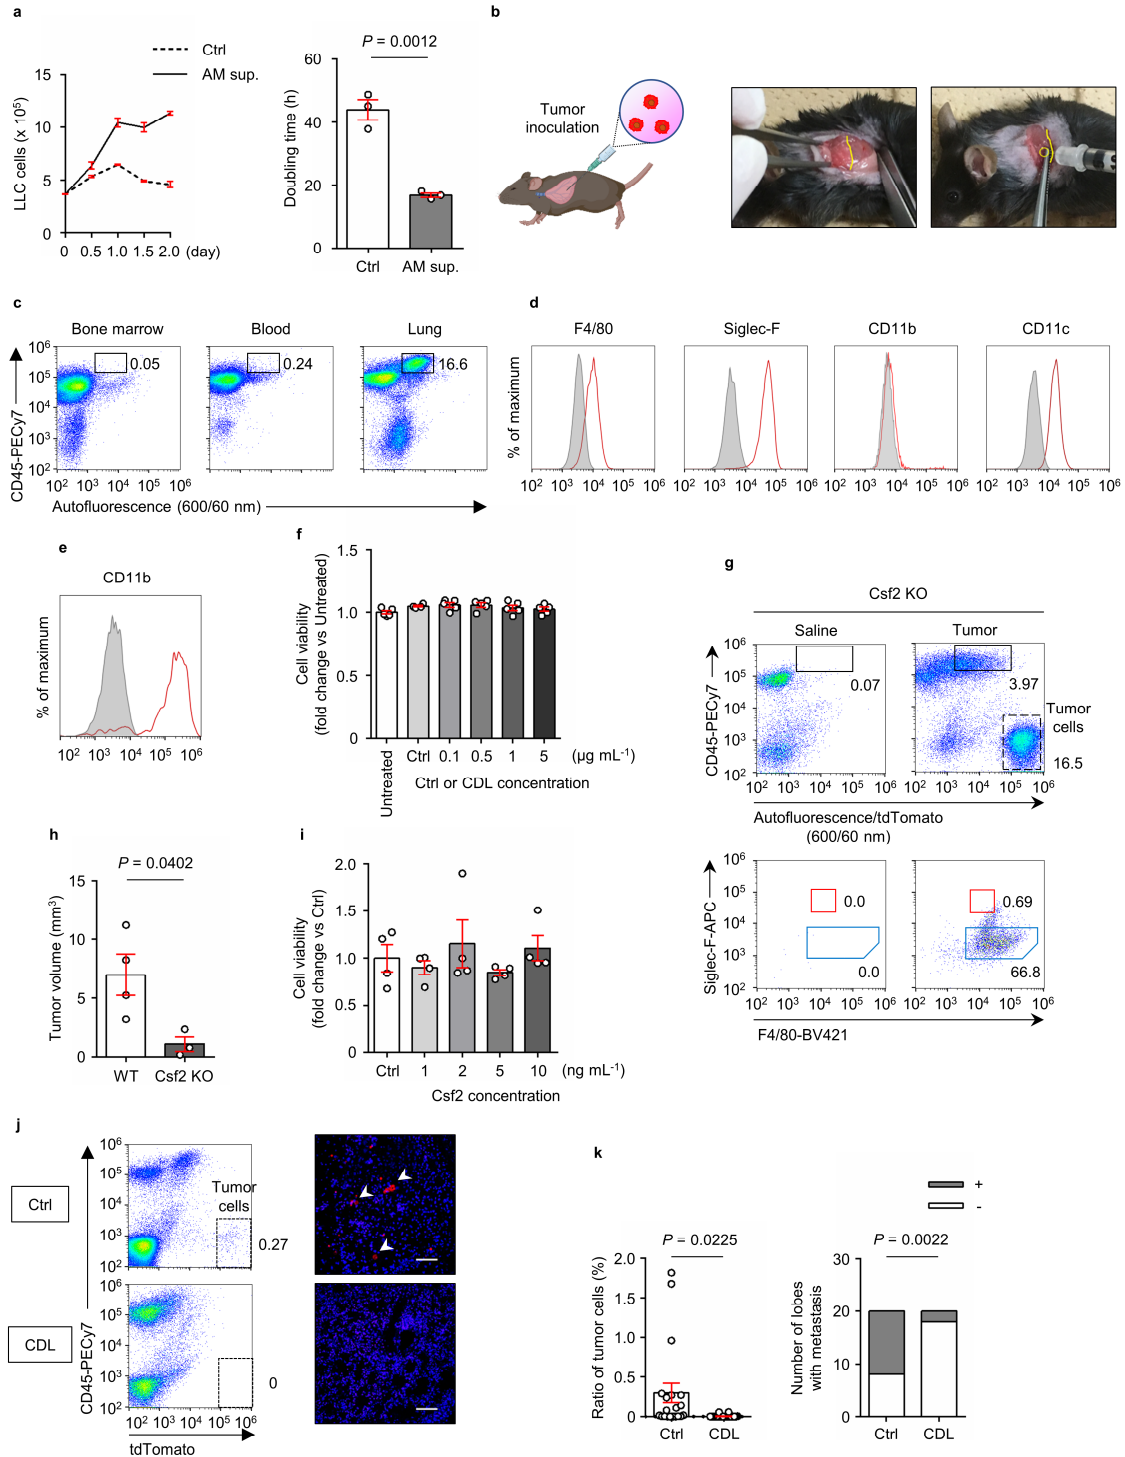

Supplementary Fig. S1. Lung alveolar macrophages (AMs) support proliferation of

**lung cancer cells.**

**a**, Cell count assay for doubling time analysis. LLC cells were seeded, starved for 24 h, and cultured in the presence or absence of AM cell supernatant for 2 days (*left*,  $n = 3$  per group). Doubling times were calculated using the counts from 0.5 and 1.0 days, considered the exponential growth phase (*right*,  $n = 3$  per group). **b**, Establishment of an orthotopic lung cancer model. The image on left shows a schematic diagram of a mouse with inoculated tumor cells in a lateral supine position, and images on right show the picture of a mouse model with exposure of thoracic cavity. Yellow line represents the diaphragm and yellow circle indicates the point of tumor inoculation. **c-d**, Flow cytometry plots of bone marrow, blood, and lung cells from C57BL/6 wild type mouse (**c**), and flow cytometry-based phenotypic characterization of CD45<sup>+</sup> autofluorescence<sup>+</sup> cells in the lung (black rectangle region of the right plot in **c**) with the indicated cell-surface markers (**d**). Shaded regions indicate staining with isotype controls. **e**, Flow cytometry histogram of TAM population (CD45<sup>+</sup>, autofluorescence<sup>+</sup>, Siglec-F<sup>-</sup> cells) with CD11b. Shaded regions indicate staining with isotype control. **f**, Cell viability of LLC cells with administration of each dose of clodronate liposome (CDL) or control liposome (Ctrl). Cell viability was measured using the WST-1 assay ( $n = 4$  for Ctrl,  $n = 5$  for other groups). **g**, Flow cytometry plots of lung cells from Csf2 knockout (KO) mice, with or without tumors. Plots in bottom panel indicate the analysis of CD45<sup>+</sup>

autofluorescence<sup>+</sup> cells (black rectangular region in the top plots). The red rectangular and blue pentagonal regions indicate AMs and TAMs, respectively. **h**, Tumor volume of wild-type (WT) and Csf2 KO mice (n = 4 mice for WT, n = 3 mice for Csf2 KO). **i**, Cell viability of LLC cells with administration of each dose of recombinant csf2. (n = 4 per group). **j**, Flow cytometry plots (*left*) and confocal microscopy images (*right*) of cells in contralateral lung lobes from Ctrl mice and CDL-treated mice, with tumor-bearing condition. In confocal microscopy imaging, live cells were stained with Hoechst 33342 (blue). White arrowheads indicate tdTomato<sup>+</sup> LLC cells (red). Scale bars, 100 μm. **k**, Quantitative comparison of contralateral lung metastases. The proportion of tumor cells (CD45<sup>-</sup>, tdTomato<sup>+</sup> cells) was calculated in every lobe of the contralateral (right side) lung (*left*, n = 20 lobes per group). Means ± s.e.m. for each group are shown. Statistical significance was determined using unpaired two-tailed *t*-test (**a**, **h**, **k** left), Fisher's exact test (**k** right) or one-way ANOVA with Bonferroni's post hoc test (**f**, **i**).

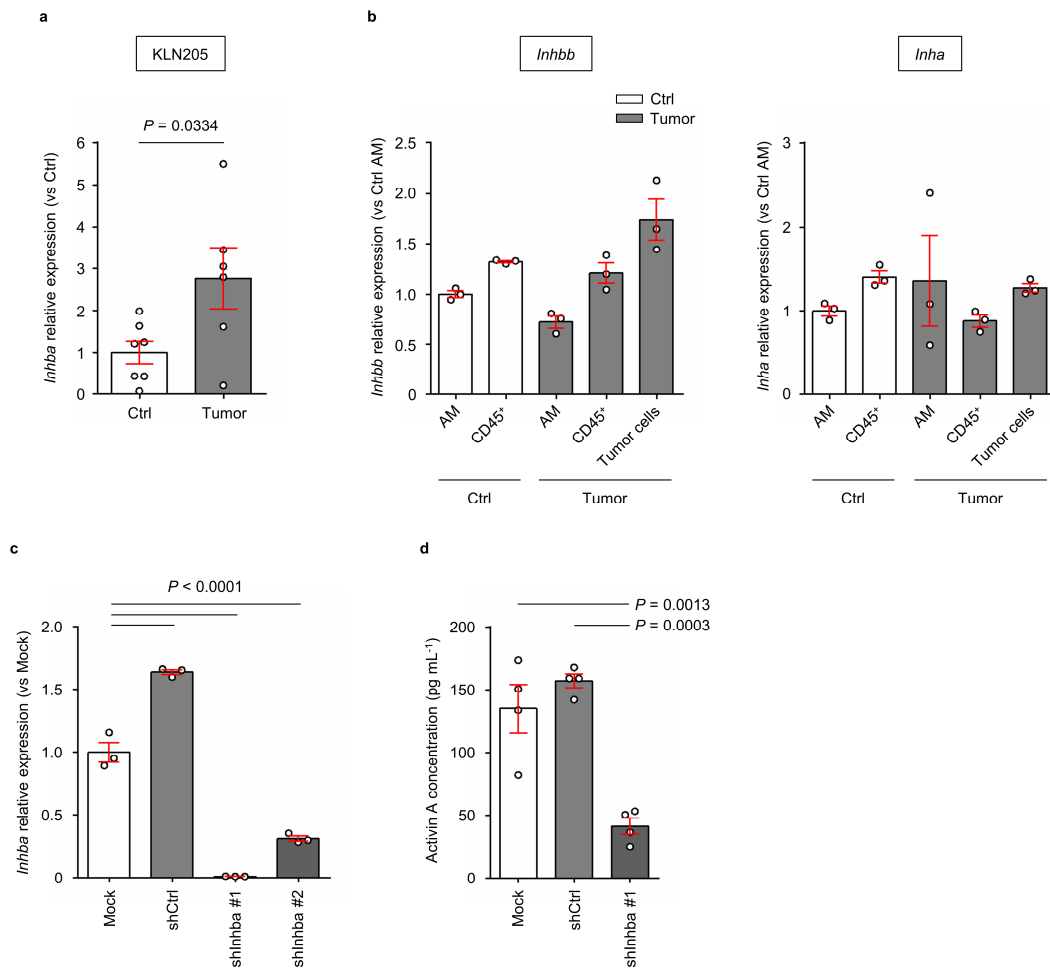

**Supplementary Fig. S2. INHBA upregulation in lung alveolar macrophages (AMs) enhances proliferation of lung cancer cells.**

**a**, RT-PCR analysis of *Inhba* expression in AM cells isolated from DBA/2 control mice and those isolated from DBA/2 tumor-bearing mice inoculated with KLN205 cells (n = 7 mice for control, n = 6 mice for tumor-bearing group). **b**, RT-PCR analysis of *Inhbb* and *Inha* expression in AMs and CD45<sup>+</sup> cells isolated from control mice, and AMs, CD45<sup>+</sup> cells and tumor cells isolated from tumor-bearing mice (n = 3 mice for per group). **c**, RT-PCR analysis of *Inhba* expression in AM cells (AMJ2-C11) with or without shRNA transfection. Two clones

(#1, 2) of AM cells transfected with the sh-*Inhba* gene were analyzed. (n = 3 per group). **d**, Measurement of activin A concentration in AMs transfected with or without shRNA using ELISA (n = 4 per group). Clone #1 in Supplementary Fig.S2c was used for the analysis. Means  $\pm$  s.e.m. for each group are shown. Statistical significance was determined using unpaired two-tailed *t* test (**a**) and one-way ANOVA with Bonferroni's post hoc test (**b-d**).

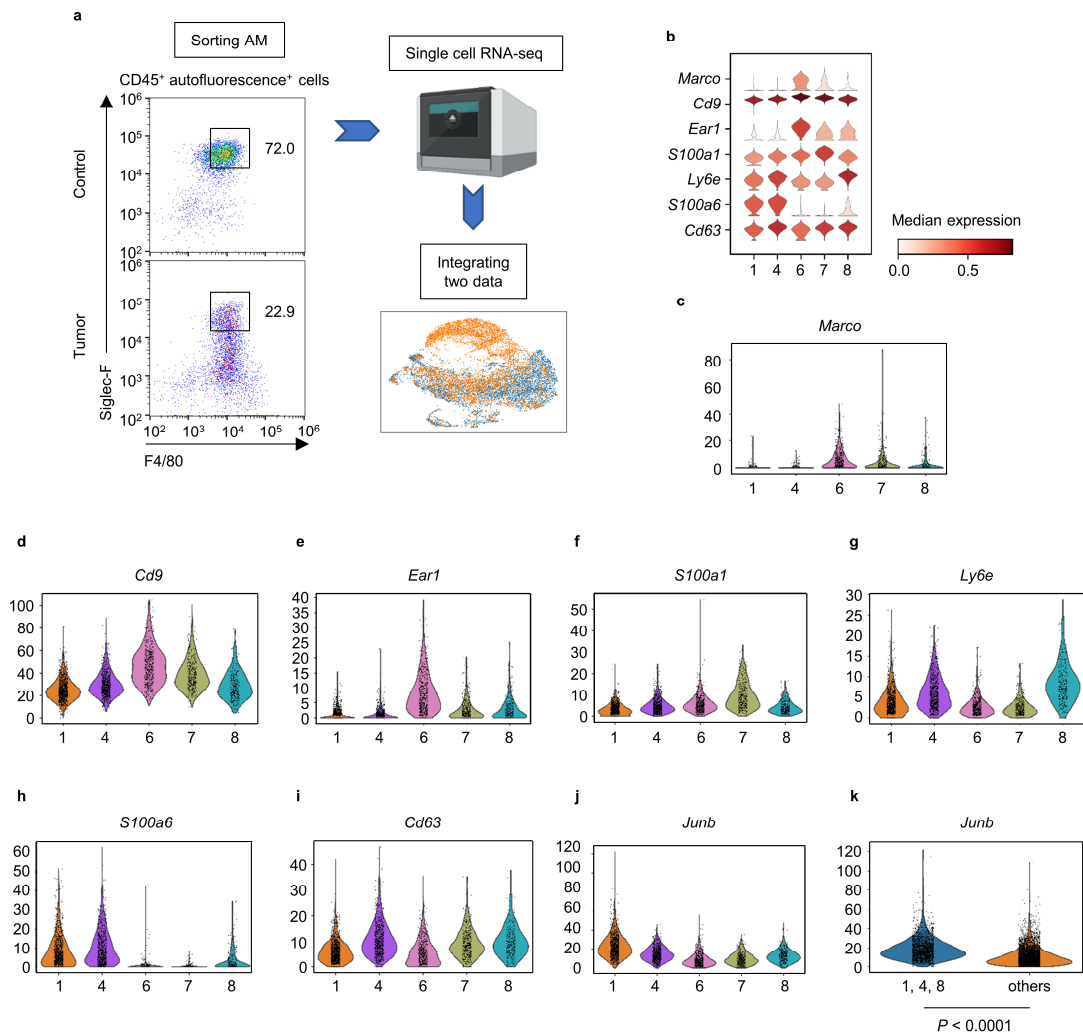

**Supplementary Fig. S3. Single-cell RNA-seq identifies a subtype of tumor-supporting alveolar macrophages (AMs).**

**a**, Schematic protocol of the single cell RNA-seq analysis. Alveolar macrophages (AMs) were sorted from control mouse or tumor-bearing mouse. **b**, Median expression levels of the assigned markers: *Marco*, *Cd9*, *Ear1*, *S100a1*, *Ly6e*, *S100a6*, *Cd63*. **c–j**, Violin plots show the expression level of genes in clusters 1, 4, 6, 7, and 8. Each dot represents a single cell. **k**, Violin plot showing the expression level of the *Junb* gene in 3 clusters (1, 4, and 8)

compared with the other 11 clusters. Statistical significance was determined using two-tailed

Mann-Whitney  $U$  test (**k**).



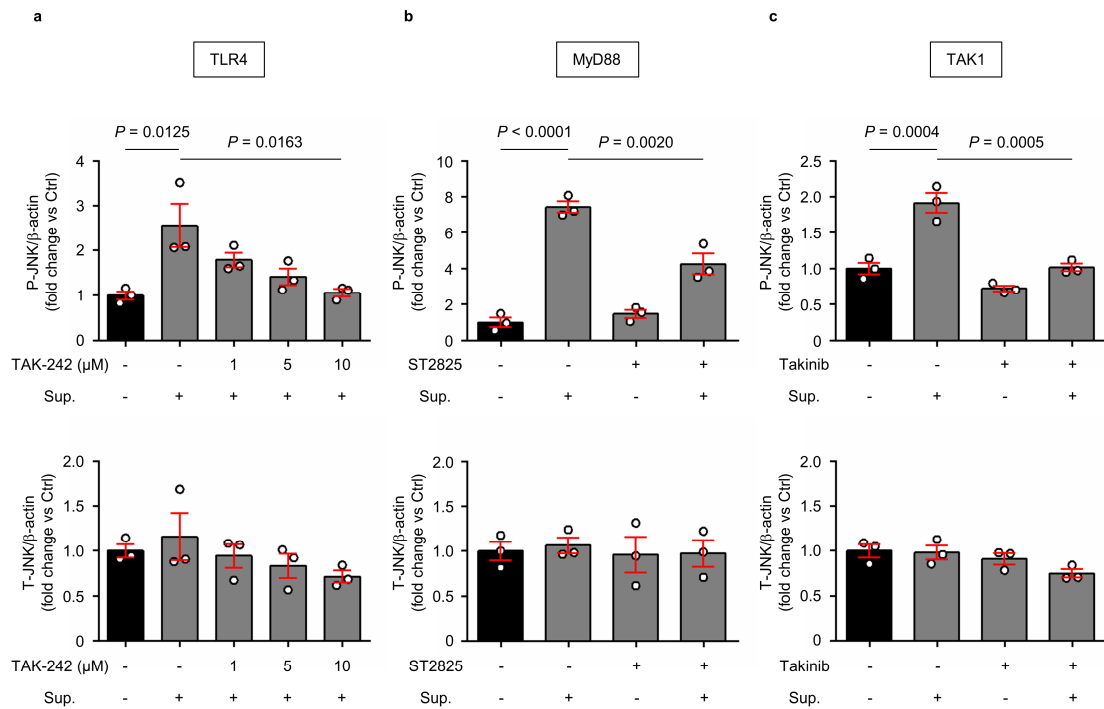

**Supplementary Fig. S4. INHBA expression in alveolar macrophages (AMs) is induced via MyD88-JNK dependent pathway.**

**a-c**, Quantification of immunoblotting images using Image J software (n = 3 per group). The samples derive from the same experiment and the gels were processed in parallel. Statistical significance was determined using one-way ANOVA with Bonferroni's post hoc test. Means  $\pm$  s.e.m. for each group are shown.

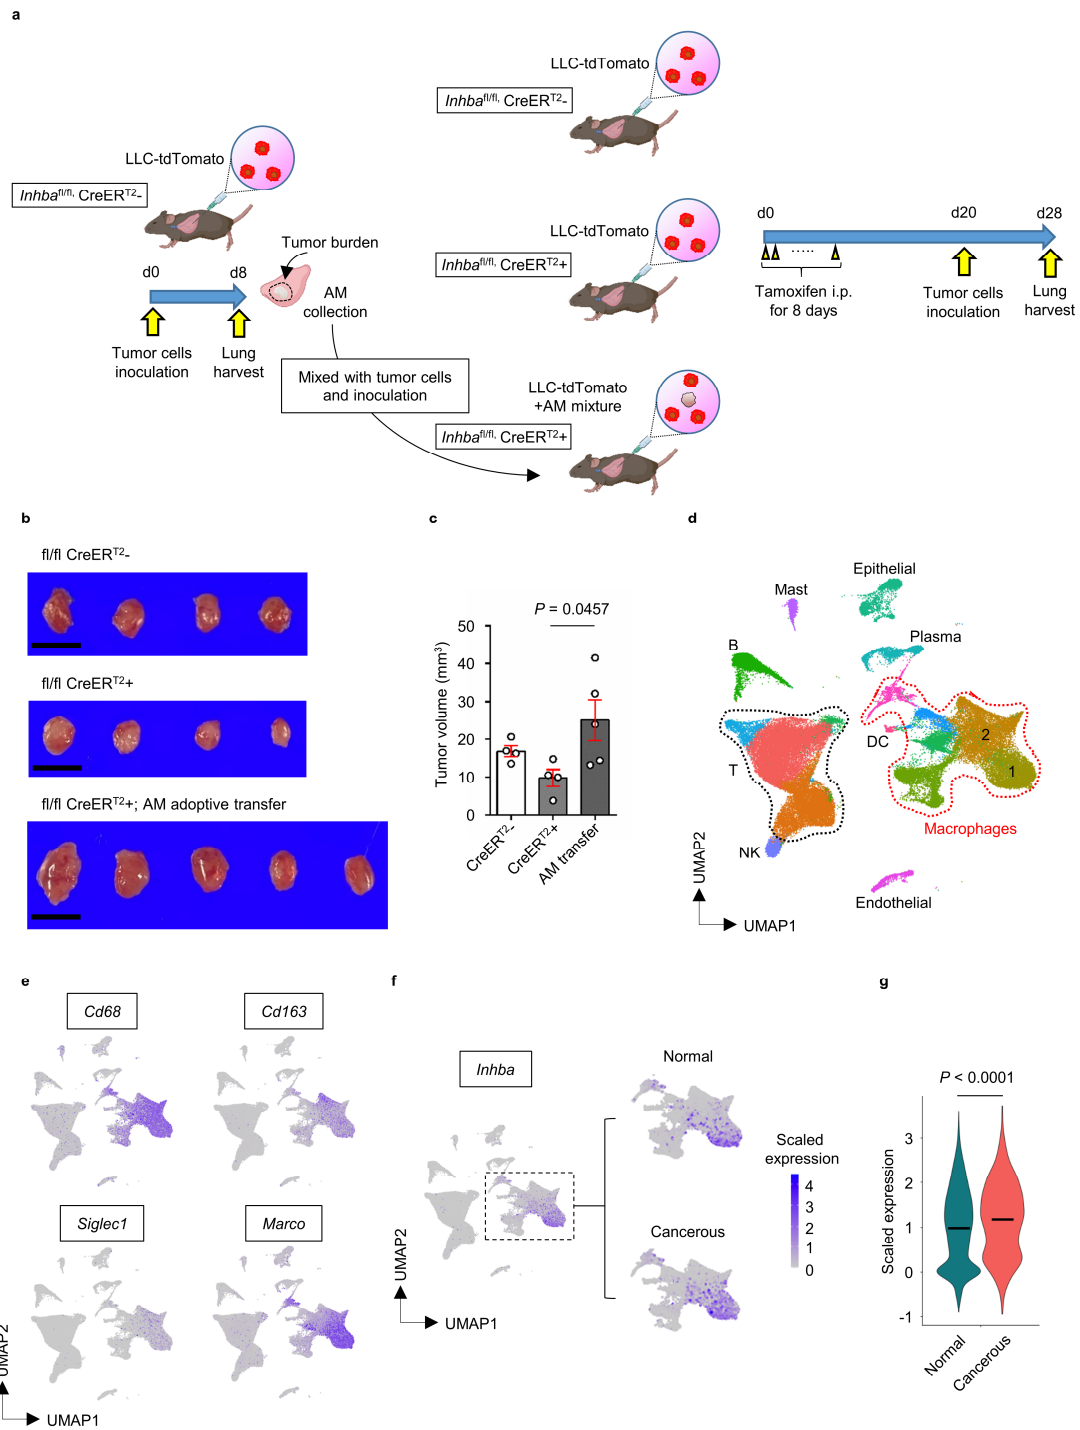

**Supplementary Fig. S5. Tumor proliferation is suppressed in INHBA-deficient condition.**

**a**, Experimental design schematic of orthotopic lung cancer model using tamoxifen-inducible *Inhba* knockout mice with or without adoptive transfer of AMs from tumor tissue. **b**, Gross appearance of tumors from *Inhba*<sup>fl/fl</sup> CreERT<sup>2-</sup> (upper), *Inhba*<sup>fl/fl</sup> CreERT<sup>2+</sup> without transfer (middle), and *Inhba*<sup>fl/fl</sup> CreERT<sup>2+</sup> with AM transfer (lower) mice. Scale bars; 5 mm. **c**, Tumor volume of *Inhba*<sup>fl/fl</sup> CreERT<sup>2-</sup>, *Inhba*<sup>fl/fl</sup> CreERT<sup>2+</sup> without transfer, and *Inhba*<sup>fl/fl</sup> CreERT<sup>2+</sup> with AM transfer mice (n = 4 for *Inhba*<sup>fl/fl</sup> CreERT<sup>2-</sup> and *Inhba*<sup>fl/fl</sup> CreERT<sup>2+</sup> without transfer, n = 5 for *Inhba*<sup>fl/fl</sup> CreERT<sup>2+</sup> with AM transfer). Means ± s.e.m. for each group are shown. **d-f**, UMAP plot of single-cell RNA-seq data of CD45<sup>+</sup> cells from normal and cancerous human lungs. (**d**) Data from 62,188 cells were analyzed and hierarchically clustered into 20 clusters. (**e**) *Cd68*<sup>+</sup>, *Siglec1*<sup>+</sup>, *Cd163*<sup>+</sup>, and *Marco*<sup>+</sup> cell distributions are depicted in the UMAP. (**f**) *Inhba* expression is shown in the UMAP. Normal and cancerous samples are separately represented. **g**, Violin plot showing statistical comparison of *Inhba* expression between normal and cancerous samples. Statistical significance was determined using one-way ANOVA with the Tukey–Kramer post hoc test (**c**) and two-tailed Mann-Whitney *U* test (**g**).

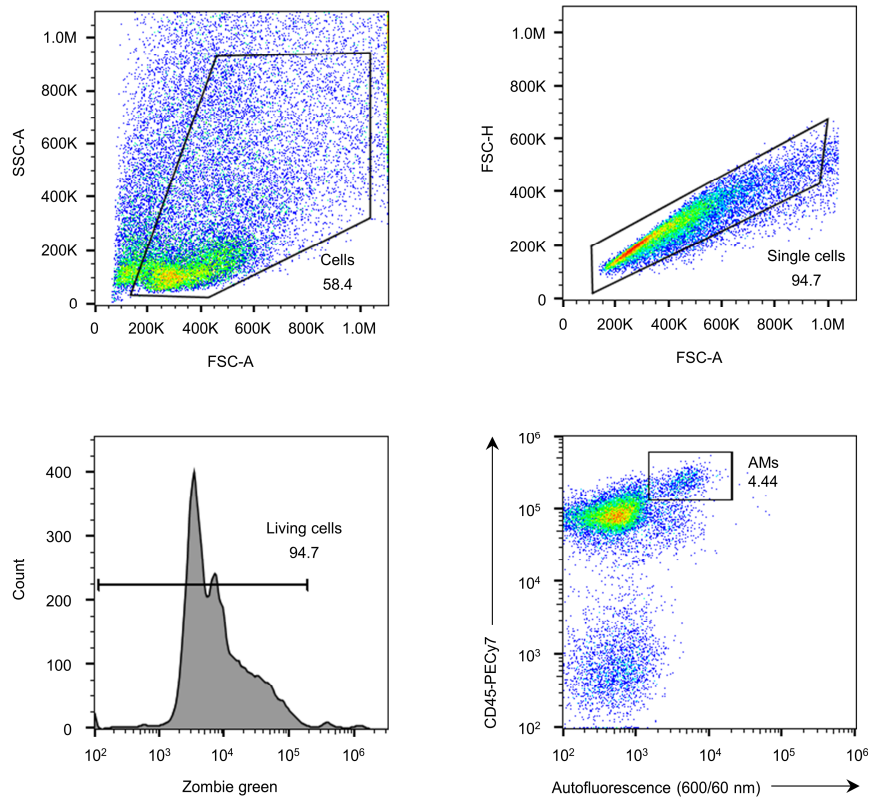

**Supplementary Fig. S6. FACS gating strategy.**

Gating strategies to evaluate alveolar macrophages in mouse lung.

**Supplementary Table 1. Patients information participating in this study**

|                         |                |
|-------------------------|----------------|
| All patients            | 10             |
| Age (mean)              | 68 (33-77)     |
| Sex                     |                |
| Male                    | 4              |
| Female                  | 6              |
| Smoking status          |                |
| Never                   | 6              |
| Previous                | 4              |
| Current                 | 0              |
| Brinkman index (mean)   | 254 (0-1000)   |
| Histological type       |                |
| Adenocarcinoma in situ  | 5              |
| Invasive adenocarcinoma | 5              |
| Tumor size (cm) (mean)  | 1.83 (0.5-3.0) |

**Supplementary Table 2. Top 30 genes list by z score with significantly higher**

**expression in clusters 1, 4, and 8 in our scRNA-seq**

|    | names    | z scores  | logfoldchanges |
|----|----------|-----------|----------------|
| 1  | Psap     | 58.12719  | 37.907993      |
| 2  | Ctss     | 54.142147 | 32.97345       |
| 3  | S100a6   | 54.09692  | 12.377324      |
| 4  | H2-K1    | 51.51078  | 9.523902       |
| 5  | Fn1      | 50.803757 | 13.069393      |
| 6  | Btg1     | 44.736916 | 8.038326       |
| 7  | Ctsd     | 43.70734  | 37.835403      |
| 8  | Osm      | 40.99539  | 8.095782       |
| 9  | Cd93     | 40.29486  | 2.962887       |
| 10 | Ccl6     | 39.61628  | 36.825386      |
| 11 | Junb     | 39.22363  | 11.449209      |
| 12 | Ly6e     | 39.10954  | 4.219331       |
| 13 | Pim1     | 39.093525 | 5.8839893      |
| 14 | Syng1    | 38.735348 | 3.8481         |
| 15 | Cd14     | 37.526943 | 4.153883       |
| 16 | Cd63     | 37.358265 | 5.8800063      |
| 17 | Ier3     | 36.866646 | 5.4844666      |
| 18 | Spp1     | 36.760548 | 33.711117      |
| 19 | Npc2     | 36.566353 | 4.2792587      |
| 20 | Ifi2712a | 36.53933  | 9.146865       |
| 21 | Sash1    | 36.414455 | 2.8877945      |
| 22 | B2m      | 35.28279  | 9.948016       |
| 23 | Crip1    | 34.488342 | 13.002372      |
| 24 | H2-D1    | 33.37018  | 8.176224       |
| 25 | Mmp19    | 32.82604  | 5.1380067      |
| 26 | Vps37b   | 32.76197  | 3.927517       |
| 27 | Ecm1     | 32.40622  | 3.6515296      |
| 28 | Gng12    | 32.39431  | 2.0754683      |
| 29 | Trem2    | 31.84922  | 2.4744933      |
| 30 | Hopx     | 31.425095 | 3.5770764      |

**Supplementary Table 3. Antibody information used in this study**

| Molecule                     | Clone      | Conjugate            | Vendor                    | Catalog number | Concentration | Concentration used | Usage                |
|------------------------------|------------|----------------------|---------------------------|----------------|---------------|--------------------|----------------------|
| CD45                         | 30-F11     | PE-Cyanine7          | BioLegend                 | 103114         | 0.2 mg/mL     | 1/50               | FACS                 |
| F4/80                        | BM8        | Brilliant Violet 421 | BioLegend                 | 123132         | 0.2 mg/mL     | 1/50               | FACS                 |
| CD11c                        | N418       | APC                  | BioLegend                 | 117310         | 0.2 mg/mL     | 1/50               | FACS                 |
| CD11b                        | M1/70      | Brilliant Violet 421 | BioLegend                 | 101235         | 0.2 mg/mL     | 1/50               | FACS                 |
| Siglec-F                     | REA798     | APC                  | Miltenyi Biotec           | 130-112-333    | 0.15 mg/mL    | 1/50               | FACS                 |
| CD11b                        | REA592     | APC                  | Miltenyi Biotec           | 130-113-802    | 0.15 mg/mL    | 1/50               | FACS                 |
| MARCO                        | 2359A      | None                 | R&D Systems               | MAB29561       | 0.5 mg/mL     | 1/500              | FACS                 |
| Isotype Ctrl                 | RTK2758    | Brilliant Violet 421 | BioLegend                 | 400535         | 0.2 mg/mL     | 1/50               | FACS                 |
| Isotype Ctrl                 | QA16A12    | APC                  | BioLegend                 | 403505         | 0.2 mg/mL     | 1/50               | FACS                 |
| Anti-rabbit                  | Polyclonal | Alexa Fluor 647      | Jackson Immuno Research   | 711-605-152    | 1.5 mg/mL     | 1/200              | FACS                 |
| CD16/32                      | 2.4G2      | None                 | BD Biosciences            | 553141         | 0.5 mg/mL     | 1/100              | FACS                 |
| Phospho-SAPK/JNK             | Polyclonal | None                 | Cell Signaling Technology | 9251           | -             | 1/1000             | Immunoblotting       |
| SAPK/JNK                     | Polyclonal | None                 | Cell Signaling Technology | 9252           | -             | 1/1000             | Immunoblotting       |
| Phospho-p44/42 MAPK (Erk1/2) | D13.14.4E  | None                 | Cell Signaling Technology | 4370           | -             | 1/1000             | Immunoblotting       |
| p44/42 MAPK (Erk1/2)         | 137F5      | None                 | Cell Signaling Technology | 4695           | -             | 1/1000             | Immunoblotting       |
| Phospho-Smad2                | 138D4      | None                 | Cell Signaling Technology | 3108           | -             | 1/1000             | Immunoblotting       |
| Smad2                        | D43B4      | None                 | Cell Signaling Technology | 5339           | -             | 1/1000             | Immunoblotting       |
| $\beta$ -Actin               | 13E5       | HRP conjugate        | Cell Signaling Technology | 5125           | -             | 1/1000             | Immunoblotting       |
| Anti-rabbit                  | -          | HRP conjugate        | Cell Signaling Technology | 7074           | -             | 1/1000             | Immunoblotting       |
| Inhibin beta A               | polyclonal | None                 | abcam                     | ab56057        | 0.5 mg/mL     | 1/200              | Immunohistochemistry |
| TTF-1                        | SP141      | None                 | abcam                     | ab227652       | -             | 1/100              | Immunohistochemistry |
| CD163                        | 10D6       | None                 | Leica biosystems          | CD163          | 0.049 mg/mL   | 1/800              | Immunohistochemistry |
